# Supplementary material for: Historical Occurrence of Algal Blooms in the Northern Beibu Gulf of China and Implications for Future Trends
Source: Front Microbiol. 2019 Mar 13;10:451. doi: 10.3389/fmicb.2019.00451 (PMC6424905; doi:10.3389/fmicb.2019.00451)
Supplement: Supplementary file 2 [file Table_2.XLS]

## Sheet: DIN
Year	Dissolved Inorganic Nitrogen/DIN (µM)	References
1991	35.6429	Qin, Q. R., and Long, X. H. (2000). Assessment on eutrophication of Beihai offshore. Marine Environmental Science 19(2), 43-45 (in Chinese).
1991	31.8571	Qin, Q. R., and Long, X. H. (2000). Assessment on eutrophication of Beihai offshore. Marine Environmental Science 19(2), 43-45 (in Chinese).
1992	2.92857	Qin, Q. R., and Long, X. H. (2000). Assessment on eutrophication of Beihai offshore. Marine Environmental Science 19(2), 43-45 (in Chinese).
1992	1.57143	Qin, Q. R., and Long, X. H. (2000). Assessment on eutrophication of Beihai offshore. Marine Environmental Science 19(2), 43-45 (in Chinese).
1993	10.6429	Qin, Q. R., and Long, X. H. (2000). Assessment on eutrophication of Beihai offshore. Marine Environmental Science 19(2), 43-45 (in Chinese).
1993	8.42857	Qin, Q. R., and Long, X. H. (2000). Assessment on eutrophication of Beihai offshore. Marine Environmental Science 19(2), 43-45 (in Chinese).
1994	30.7143	Qin, Q. R., and Long, X. H. (2000). Assessment on eutrophication of Beihai offshore. Marine Environmental Science 19(2), 43-45 (in Chinese).
1994	26.7143	Qin, Q. R., and Long, X. H. (2000). Assessment on eutrophication of Beihai offshore. Marine Environmental Science 19(2), 43-45 (in Chinese).
1995	11.7857	Qin, Q. R., and Long, X. H. (2000). Assessment on eutrophication of Beihai offshore. Marine Environmental Science 19(2), 43-45 (in Chinese).
1995	7	Qin, Q. R., and Long, X. H. (2000). Assessment on eutrophication of Beihai offshore. Marine Environmental Science 19(2), 43-45 (in Chinese).
1995	15.54	He, B. M., and Wei, M. X. (2009). Reason and mechanism caused red tide in Beihai Bay. Marine Environmental Science 28(1), 62-66 (in Chinese).
1995	6.87	He, B. M., and Wei, M. X. (2009). Reason and mechanism caused red tide in Beihai Bay. Marine Environmental Science 28(1), 62-66 (in Chinese).
1995	17.8571	Wei, M. X., and He, B. M. (1998). A study on eutrophication and red tide formation in Lianzhou Bay. Trop. Oceanol. 17(4), 65-72 (in Chinese).
1995	15	Wei, M. X., and He, B. M. (1998). A study on eutrophication and red tide formation in Lianzhou Bay. Trop. Oceanol. 17(4), 65-72 (in Chinese).
1995	5.64286	Wei, M. X., and He, B. M. (1998). A study on eutrophication and red tide formation in Lianzhou Bay. Trop. Oceanol. 17(4), 65-72 (in Chinese).
1995	11.4286	Wei, M. X., and He, B. M. (1998). A study on eutrophication and red tide formation in Lianzhou Bay. Trop. Oceanol. 17(4), 65-72 (in Chinese).
1995	7.14286	Wei, M. X., and He, B. M. (1998). A study on eutrophication and red tide formation in Lianzhou Bay. Trop. Oceanol. 17(4), 65-72 (in Chinese).
1995	11.4286	Wei, M. X., and He, B. M. (1998). A study on eutrophication and red tide formation in Lianzhou Bay. Trop. Oceanol. 17(4), 65-72 (in Chinese).
1995	13.5714	Wei, M. X., and He, B. M. (1998). A study on eutrophication and red tide formation in Lianzhou Bay. Trop. Oceanol. 17(4), 65-72 (in Chinese).
1995	10	Wei, M. X., and He, B. M. (1998). A study on eutrophication and red tide formation in Lianzhou Bay. Trop. Oceanol. 17(4), 65-72 (in Chinese).
1995	7.85714	Wei, M. X., and He, B. M. (1998). A study on eutrophication and red tide formation in Lianzhou Bay. Trop. Oceanol. 17(4), 65-72 (in Chinese).
1996	6.28357	Lai, T. H., and Wei, M. X. (2003). The relation of change of five nutrients and environmental factors in Lianzhou Bay. Journal of Guangxi Academy of Sciences 19(1), 35-39 (in Chinese).
1996	8.44357	Lai, T. H., and Wei, M. X. (2003). The relation of change of five nutrients and environmental factors in Lianzhou Bay. Journal of Guangxi Academy of Sciences 19(1), 35-39 (in Chinese).
1996	12.1743	Lai, T. H., and Wei, M. X. (2003). The relation of change of five nutrients and environmental factors in Lianzhou Bay. Journal of Guangxi Academy of Sciences 19(1), 35-39 (in Chinese).
1996	3.91357	Lai, T. H., and Wei, M. X. (2003). The relation of change of five nutrients and environmental factors in Lianzhou Bay. Journal of Guangxi Academy of Sciences 19(1), 35-39 (in Chinese).
1996	7.07571	Lai, T. H., and Wei, M. X. (2003). The relation of change of five nutrients and environmental factors in Lianzhou Bay. Journal of Guangxi Academy of Sciences 19(1), 35-39 (in Chinese).
1996	3.92214	Lai, T. H., and Wei, M. X. (2003). The relation of change of five nutrients and environmental factors in Lianzhou Bay. Journal of Guangxi Academy of Sciences 19(1), 35-39 (in Chinese).
1996	38.5714	Chen, Q. Y. (2001). Assessment on situation of water quality in Lianzhou Bay of Guangxi. Marine Environmental Science 20(2), 56-58 (in Chinese).
1996	6.97	He, B. M., and Wei, M. X. (2009). Reason and mechanism caused red tide in Beihai Bay. Marine Environmental Science 28(1), 62-66 (in Chinese).
1996	25.9286	Qin, Q. R., and Long, X. H. (2000). Assessment on eutrophication of Beihai offshore. Marine Environmental Science 19(2), 43-45 (in Chinese).
1996	4.42857	Qin, Q. R., and Long, X. H. (2000). Assessment on eutrophication of Beihai offshore. Marine Environmental Science 19(2), 43-45 (in Chinese).
1997	30.29	He, B. M., and Wei, M. X. (2009). Reason and mechanism caused red tide in Beihai Bay. Marine Environmental Science 28(1), 62-66 (in Chinese).
1997	27.1429	Chen, Q. Y. (2001). Assessment on situation of water quality in Lianzhou Bay of Guangxi. Marine Environmental Science 20(2), 56-58 (in Chinese).
1997	38.82	Lai, T. H., and Wei, M. X. (2003). The relation of change of five nutrients and environmental factors in Lianzhou Bay. Journal of Guangxi Academy of Sciences 19(1), 35-39 (in Chinese).
1997	23.9521	Lai, T. H., and Wei, M. X. (2003). The relation of change of five nutrients and environmental factors in Lianzhou Bay. Journal of Guangxi Academy of Sciences 19(1), 35-39 (in Chinese).
1997	63.225	Lai, T. H., and Wei, M. X. (2003). The relation of change of five nutrients and environmental factors in Lianzhou Bay. Journal of Guangxi Academy of Sciences 19(1), 35-39 (in Chinese).
1997	30.9279	Lai, T. H., and Wei, M. X. (2003). The relation of change of five nutrients and environmental factors in Lianzhou Bay. Journal of Guangxi Academy of Sciences 19(1), 35-39 (in Chinese).
1997	7.25571	Lai, T. H., and Wei, M. X. (2003). The relation of change of five nutrients and environmental factors in Lianzhou Bay. Journal of Guangxi Academy of Sciences 19(1), 35-39 (in Chinese).
1997	41.0357	Lai, T. H., and Wei, M. X. (2003). The relation of change of five nutrients and environmental factors in Lianzhou Bay. Journal of Guangxi Academy of Sciences 19(1), 35-39 (in Chinese).
1997	6.80714	Lai, T. H., and Wei, M. X. (2003). The relation of change of five nutrients and environmental factors in Lianzhou Bay. Journal of Guangxi Academy of Sciences 19(1), 35-39 (in Chinese).
1998	37.8571	Chen, Q. Y. (2001). Assessment on situation of water quality in Lianzhou Bay of Guangxi. Marine Environmental Science 20(2), 56-58 (in Chinese).
1998	26.0714	Qiu, S. F., and Lai, T. H. (2004). The distribution characteristics of contents of hydrochemistry elements in the seawater of Lianzhou Bay. Journal of Guangxi Academy of Sciences 21(1), 12-16 (in Chinese).
1998	13.5714	Qiu, S. F., and Lai, T. H. (2004). The distribution characteristics of contents of hydrochemistry elements in the seawater of Lianzhou Bay. Journal of Guangxi Academy of Sciences 21(1), 12-16 (in Chinese).
1998	5.71429	Qiu, S. F., and Lai, T. H. (2004). The distribution characteristics of contents of hydrochemistry elements in the seawater of Lianzhou Bay. Journal of Guangxi Academy of Sciences 21(1), 12-16 (in Chinese).
1998	2	Qiu, S. F., and Lai, T. H. (2004). The distribution characteristics of contents of hydrochemistry elements in the seawater of Lianzhou Bay. Journal of Guangxi Academy of Sciences 21(1), 12-16 (in Chinese).
1998	5.76	He, B. M., and Wei, M. X. (2009). Reason and mechanism caused red tide in Beihai Bay. Marine Environmental Science 28(1), 62-66 (in Chinese).
1998	5.71429	Wei, M. X., Tong W. P., He, B. M., and Lai, T. H. (2000). A study on distribution of various states of nitrogen and influence factors at Beihai Bay, Guangxi province. Tropic Oceanology 19(3), 59-66 (in Chinese).
1998	1.37	He, B. M., and Wei, M. X. (2004). A study on self-purification ability of Beihai Bay. Marine Environmental Science 23(1), 16-18 (in Chinese).
1998	6.84	He, B. M., and Wei, M. X. (2004). A study on self-purification ability of Beihai Bay. Marine Environmental Science 23(1), 16-18 (in Chinese).
1999	25.76	He, B. M., and Wei, M. X. (2004). A study on self-purification ability of Beihai Bay. Marine Environmental Science 23(1), 16-18 (in Chinese).
1999	8.62	He, B. M., and Wei, M. X. (2004). A study on self-purification ability of Beihai Bay. Marine Environmental Science 23(1), 16-18 (in Chinese).
1999	4.3	He, B. M., and Wei, M. X. (2004). A study on self-purification ability of Beihai Bay. Marine Environmental Science 23(1), 16-18 (in Chinese).
1999	6.26	He, B. M., and Wei, M. X. (2004). A study on self-purification ability of Beihai Bay. Marine Environmental Science 23(1), 16-18 (in Chinese).
1999	0.89	He, B. M., and Wei, M. X. (2004). A study on self-purification ability of Beihai Bay. Marine Environmental Science 23(1), 16-18 (in Chinese).
1999	2.08	He, B. M., and Wei, M. X. (2004). A study on self-purification ability of Beihai Bay. Marine Environmental Science 23(1), 16-18 (in Chinese).
1999	1.27	He, B. M., and Wei, M. X. (2009). Reason and mechanism caused red tide in Beihai Bay. Marine Environmental Science 28(1), 62-66 (in Chinese).
1999	26.23	He, B. M., and Wei, M. X. (2009). Reason and mechanism caused red tide in Beihai Bay. Marine Environmental Science 28(1), 62-66 (in Chinese).
1999	13.29	He, B. M., and Wei, M. X. (2009). Reason and mechanism caused red tide in Beihai Bay. Marine Environmental Science 28(1), 62-66 (in Chinese).
1999	1.28571	Wei, M. X., Tong W. P., He, B. M., and Lai, T. H. (2000). A study on distribution of various states of nitrogen and influence factors at Beihai Bay, Guangxi province. Tropic Oceanology 19(3), 59-66 (in Chinese).
1999	26.4286	Wei, M. X., Tong W. P., He, B. M., and Lai, T. H. (2000). A study on distribution of various states of nitrogen and influence factors at Beihai Bay, Guangxi province. Tropic Oceanology 19(3), 59-66 (in Chinese).
1999	13.5714	Wei, M. X., Tong W. P., He, B. M., and Lai, T. H. (2000). A study on distribution of various states of nitrogen and influence factors at Beihai Bay, Guangxi province. Tropic Oceanology 19(3), 59-66 (in Chinese).
1999	1.22	Wei, M. X., Tong W. P., He, B. M., and Lai, T. H. (2000). A study on distribution of various states of nitrogen and influence factors at Beihai Bay, Guangxi province. Tropic Oceanology 19(3), 59-66 (in Chinese).
1999	26.4286	Chen, Q. Y. (2001). Assessment on situation of water quality in Lianzhou Bay of Guangxi. Marine Environmental Science 20(2), 56-58 (in Chinese).
2000	27.1429	Chen, Q. Y. (2001). Assessment on situation of water quality in Lianzhou Bay of Guangxi. Marine Environmental Science 20(2), 56-58 (in Chinese).
2003	11.0714	Qiu, S. F., and Lai, T. H. (2005). The changing characteristics of contents of physical and chemical factors in the sea water of Lianzhou Bay. Journal of Guangxi Academy of Sciences 21(3), 151-154 (in Chinese).
2003	12.7857	Qiu, S. F., and Lai, T. H. (2005). The changing characteristics of contents of physical and chemical factors in the sea water of Lianzhou Bay. Journal of Guangxi Academy of Sciences 21(3), 151-154 (in Chinese).
2004	7.92857	Qiu, S. F., and Lai, T. H. (2005). The changing characteristics of contents of physical and chemical factors in the sea water of Lianzhou Bay. Journal of Guangxi Academy of Sciences 21(3), 151-154 (in Chinese).
2004	30.6429	Qiu, S. F., and Lai, T. H. (2005). The changing characteristics of contents of physical and chemical factors in the sea water of Lianzhou Bay. Journal of Guangxi Academy of Sciences 21(3), 151-154 (in Chinese).
2004	12.79	He, B. M., and Wei, M. X. (2009). Reason and mechanism caused red tide in Beihai Bay. Marine Environmental Science 28(1), 62-66 (in Chinese).
2008	1.42857	Yang, Y., and Li, G. L. (2010). Analysis of the hydrochemistry environmental parameter variations in culture areas of Pinctada martensii dunker in Beihai Yingpan. Journal of Guangxi Academy of Sciences 26(2), 152-155 (in Chinese).
2008	1.57143	Yang, Y., and Li, G. L. (2010). Analysis of the hydrochemistry environmental parameter variations in culture areas of Pinctada martensii dunker in Beihai Yingpan. Journal of Guangxi Academy of Sciences 26(2), 152-155 (in Chinese).
2008	1.42857	Yang, Y., and Li, G. L. (2010). Analysis of the hydrochemistry environmental parameter variations in culture areas of Pinctada martensii dunker in Beihai Yingpan. Journal of Guangxi Academy of Sciences 26(2), 152-155 (in Chinese).
2008	2.92857	Yang, Y., and Li, G. L. (2010). Analysis of the hydrochemistry environmental parameter variations in culture areas of Pinctada martensii dunker in Beihai Yingpan. Journal of Guangxi Academy of Sciences 26(2), 152-155 (in Chinese).
2008	3.07143	Yang, Y., and Li, G. L. (2010). Analysis of the hydrochemistry environmental parameter variations in culture areas of Pinctada martensii dunker in Beihai Yingpan. Journal of Guangxi Academy of Sciences 26(2), 152-155 (in Chinese).
2008	1.64286	Yang, Y., and Li, G. L. (2010). Analysis of the hydrochemistry environmental parameter variations in culture areas of Pinctada martensii dunker in Beihai Yingpan. Journal of Guangxi Academy of Sciences 26(2), 152-155 (in Chinese).
2008	1.78571	Yang, Y., and Li, G. L. (2010). Analysis of the hydrochemistry environmental parameter variations in culture areas of Pinctada martensii dunker in Beihai Yingpan. Journal of Guangxi Academy of Sciences 26(2), 152-155 (in Chinese).
2009	1.21429	Yang, Y., and Li, G. L. (2010). Analysis of the hydrochemistry environmental parameter variations in culture areas of Pinctada martensii dunker in Beihai Yingpan. Journal of Guangxi Academy of Sciences 26(2), 152-155 (in Chinese).
2009	0.714286	Yang, Y., and Li, G. L. (2010). Analysis of the hydrochemistry environmental parameter variations in culture areas of Pinctada martensii dunker in Beihai Yingpan. Journal of Guangxi Academy of Sciences 26(2), 152-155 (in Chinese).
2009	0.714286	Yang, Y., and Li, G. L. (2010). Analysis of the hydrochemistry environmental parameter variations in culture areas of Pinctada martensii dunker in Beihai Yingpan. Journal of Guangxi Academy of Sciences 26(2), 152-155 (in Chinese).
2009	1.21429	Yang, Y., and Li, G. L. (2010). Analysis of the hydrochemistry environmental parameter variations in culture areas of Pinctada martensii dunker in Beihai Yingpan. Journal of Guangxi Academy of Sciences 26(2), 152-155 (in Chinese).
2009	1.85714	Yang, Y., and Li, G. L. (2010). Analysis of the hydrochemistry environmental parameter variations in culture areas of Pinctada martensii dunker in Beihai Yingpan. Journal of Guangxi Academy of Sciences 26(2), 152-155 (in Chinese).
2009	2.78571	Yang, Y., and Li, G. L. (2010). Analysis of the hydrochemistry environmental parameter variations in culture areas of Pinctada martensii dunker in Beihai Yingpan. Journal of Guangxi Academy of Sciences 26(2), 152-155 (in Chinese).
2009	1	Yang, Y., and Li, G. L. (2010). Analysis of the hydrochemistry environmental parameter variations in culture areas of Pinctada martensii dunker in Beihai Yingpan. Journal of Guangxi Academy of Sciences 26(2), 152-155 (in Chinese).
2009	7	Li, P., Liu, B. L., and Chen, X. Y. (2011). Nutrients distribution and eutrophication in aquaculture area at Lianzhou Bay, Guangxi. Science & technology communication 17, 75-76 (in Chinese).
2009	5.35714	Li, P., Liu, B. L., and Chen, X. Y. (2011). Nutrients distribution and eutrophication in aquaculture area at Lianzhou Bay, Guangxi. Science & technology communication 17, 75-76 (in Chinese).
2009	15.6429	Li, P., Liu, B. L., and Chen, X. Y. (2011). Nutrients distribution and eutrophication in aquaculture area at Lianzhou Bay, Guangxi. Science & technology communication 17, 75-76 (in Chinese).
2009	9.85714	Zhang, S. F., Song, D. H., Zhang, C. H., and Xing, S. K. (2014). Numerical simulation on pollutant concentrations of DIN, DIP and COD in Lianzhou Bay, Guangxi. Journal of Qinzhou University 29(8), 1-5 (in Chinese).
2010	22.34	Sun, T. (2012). Water movement, water quality investigation and the strategies towards aquaculture waste water discharge: A case study in Lianzhou Bay, Guangxi Province, China. [Dissertation]. [Qingdao]: Ocean University of China, pp. 44-54 (in Chinese).
2010	11.2857	Li, P., Liu, B. L., and Chen, X. Y. (2011). Nutrients distribution and eutrophication in aquaculture area at Lianzhou Bay, Guangxi. Science & technology communication 17, 75-76 (in Chinese).
2010	22.2857	Li, P., Liu, B. L., and Chen, X. Y. (2011). Nutrients distribution and eutrophication in aquaculture area at Lianzhou Bay, Guangxi. Science & technology communication 17, 75-76 (in Chinese).
2010	28.2143	Li, P., Liu, B. L., and Chen, X. Y. (2011). Nutrients distribution and eutrophication in aquaculture area at Lianzhou Bay, Guangxi. Science & technology communication 17, 75-76 (in Chinese).
2010	8.23571	Lai, J. X., Jiang, F. J., Ke, K., Xu, M. B., Lei, F., and Chen, B. (2014). Nutrients distribution and trophic status assessment in the northern Beibu Gulf, China. Chinese Journal of Oceanology & Limnology 32(5), 1128-1144.
2013	30	Huang, L. Y., Li, X. Z., Wu, X. Q., Yang, S. L., Wei, X. X., and Pang, Y. F. (2017). Water quality evaluation of shellfish culture areas of Lianzhou Bay based on principal component analysis method. Fishery Modernization 44(1), 69-74 (in Chinese).
2014	29.2857	Huang, L. Y., Li, X. Z., Wu, X. Q., Yang, S. L., Wei, X. X., and Pang, Y. F. (2017). Water quality evaluation of shellfish culture areas of Lianzhou Bay based on principal component analysis method. Fishery Modernization 44(1), 69-74 (in Chinese).
2014	65.7143	Yang, J., Zhang, R. D., Zhao, Z. M., Weng, S. C., and Li, F. H. (2015). Temporal and spatial distribution characteristics of nutrients in the coastal seawater of Guangxi Beibu Gulf during the past 25 years. Ecology & Environmental Sciences 24(9), 1493-1498 (in Chinese).
2015	19.2857	Huang, L. Y., Li, X. Z., Wu, X. Q., Yang, S. L., Wei, X. X., and Pang, Y. F. (2017). Water quality evaluation of shellfish culture areas of Lianzhou Bay based on principal component analysis method. Fishery Modernization 44(1), 69-74 (in Chinese).

## Sheet: NO3
Year	NO3 (µM)	References
1995	9.95	He, B. M., and Wei, M. X. (2012). Variation of dissolve inorganic nitrogen and its relationship with environmental factors in Beihai bay in a 10 year period. Marine Sciences 36(2), 96-102 (in Chinese).
1995	10.7143	Wei, M. X., and He, B. M. (1998). A study on eutrophication and red tide formation in Lianzhou Bay. Tropic Oceanology 17(4), 65-72 (in Chinese).
1995	10	Wei, M. X., and He, B. M. (1998). A study on eutrophication and red tide formation in Lianzhou Bay. Tropic Oceanology 17(4), 65-72 (in Chinese).
1995	2.64286	Wei, M. X., and He, B. M. (1998). A study on eutrophication and red tide formation in Lianzhou Bay. Tropic Oceanology 17(4), 65-72 (in Chinese).
1995	8.57143	Wei, M. X., and He, B. M. (1998). A study on eutrophication and red tide formation in Lianzhou Bay. Tropic Oceanology 17(4), 65-72 (in Chinese).
1995	3.64286	Wei, M. X., and He, B. M. (1998). A study on eutrophication and red tide formation in Lianzhou Bay. Tropic Oceanology 17(4), 65-72 (in Chinese).
1995	2.92857	Wei, M. X., and He, B. M. (1998). A study on eutrophication and red tide formation in Lianzhou Bay. Tropic Oceanology 17(4), 65-72 (in Chinese).
1995	7.85714	Wei, M. X., and He, B. M. (1998). A study on eutrophication and red tide formation in Lianzhou Bay. Tropic Oceanology 17(4), 65-72 (in Chinese).
1995	4.57143	Wei, M. X., and He, B. M. (1998). A study on eutrophication and red tide formation in Lianzhou Bay. Tropic Oceanology 17(4), 65-72 (in Chinese).
1995	2.78571	Wei, M. X., and He, B. M. (1998). A study on eutrophication and red tide formation in Lianzhou Bay. Tropic Oceanology 17(4), 65-72 (in Chinese).
1996	3.57714	Lai, T. H., and Wei, M. X. (2003). The relation of change of five nutrients and environmental factors in Lianzhou Bay. Journal of Guangxi Academy of Sciences 19(1), 35-39 (in Chinese).
1996	6.635	Lai, T. H., and Wei, M. X. (2003). The relation of change of five nutrients and environmental factors in Lianzhou Bay. Journal of Guangxi Academy of Sciences 19(1), 35-39 (in Chinese).
1996	5.03286	Lai, T. H., and Wei, M. X. (2003). The relation of change of five nutrients and environmental factors in Lianzhou Bay. Journal of Guangxi Academy of Sciences 19(1), 35-39 (in Chinese).
1996	2.37643	Lai, T. H., and Wei, M. X. (2003). The relation of change of five nutrients and environmental factors in Lianzhou Bay. Journal of Guangxi Academy of Sciences 19(1), 35-39 (in Chinese).
1996	5.29429	Lai, T. H., and Wei, M. X. (2003). The relation of change of five nutrients and environmental factors in Lianzhou Bay. Journal of Guangxi Academy of Sciences 19(1), 35-39 (in Chinese).
1996	2.65714	Lai, T. H., and Wei, M. X. (2003). The relation of change of five nutrients and environmental factors in Lianzhou Bay. Journal of Guangxi Academy of Sciences 19(1), 35-39 (in Chinese).
1996	4.26	He, B. M., and Wei, M. X. (2012). Variation of dissolve inorganic nitrogen and its relationship with environmental factors in Beihai bay in a 10 year period. Marine Sciences 36(2), 96-102 (in Chinese).
1997	28.21	He, B. M., and Wei, M. X. (2012). Variation of dissolve inorganic nitrogen and its relationship with environmental factors in Beihai bay in a 10 year period. Marine Sciences 36(2), 96-102 (in Chinese).
1997	37.3043	Lai, T. H., and Wei, M. X. (2003). The relation of change of five nutrients and environmental factors in Lianzhou Bay. Journal of Guangxi Academy of Sciences 19(1), 35-39 (in Chinese).
1997	22.0364	Lai, T. H., and Wei, M. X. (2003). The relation of change of five nutrients and environmental factors in Lianzhou Bay. Journal of Guangxi Academy of Sciences 19(1), 35-39 (in Chinese).
1997	61.3093	Lai, T. H., and Wei, M. X. (2003). The relation of change of five nutrients and environmental factors in Lianzhou Bay. Journal of Guangxi Academy of Sciences 19(1), 35-39 (in Chinese).
1997	29.06	Lai, T. H., and Wei, M. X. (2003). The relation of change of five nutrients and environmental factors in Lianzhou Bay. Journal of Guangxi Academy of Sciences 19(1), 35-39 (in Chinese).
1997	4.915	Lai, T. H., and Wei, M. X. (2003). The relation of change of five nutrients and environmental factors in Lianzhou Bay. Journal of Guangxi Academy of Sciences 19(1), 35-39 (in Chinese).
1997	38.0764	Lai, T. H., and Wei, M. X. (2003). The relation of change of five nutrients and environmental factors in Lianzhou Bay. Journal of Guangxi Academy of Sciences 19(1), 35-39 (in Chinese).
1997	4.77	Lai, T. H., and Wei, M. X. (2003). The relation of change of five nutrients and environmental factors in Lianzhou Bay. Journal of Guangxi Academy of Sciences 19(1), 35-39 (in Chinese).
1998	22.8571	Qiu, S. F., and Lai, T. H. (2004). The distribution characteristics of contents of hydrochemistry elements in the seawater of Lianzhou Bay. Journal of Guangxi Academy of Sciences 21(1), 12-16 (in Chinese).
1998	12.1429	Qiu, S. F., and Lai, T. H. (2004). The distribution characteristics of contents of hydrochemistry elements in the seawater of Lianzhou Bay. Journal of Guangxi Academy of Sciences 21(1), 12-16 (in Chinese).
1998	4.28571	Qiu, S. F., and Lai, T. H. (2004). The distribution characteristics of contents of hydrochemistry elements in the seawater of Lianzhou Bay. Journal of Guangxi Academy of Sciences 21(1), 12-16 (in Chinese).
1998	0.785714	Qiu, S. F., and Lai, T. H. (2004). The distribution characteristics of contents of hydrochemistry elements in the seawater of Lianzhou Bay. Journal of Guangxi Academy of Sciences 21(1), 12-16 (in Chinese).
1998	4.27	He, B. M., and Wei, M. X. (2012). Variation of dissolve inorganic nitrogen and its relationship with environmental factors in Beihai bay in a 10 year period. Marine Sciences 36(2), 96-102 (in Chinese).
1998	4.21429	Wei, M. X., Tong W. P., He, B. M., and Lai, T. H. (2000). Distribution of inorganic nitrogen and its relationship to environmental factors in Beihai Bay. Marine Environmental Science 19(2), 25-29 (in Chinese).
1998	0.63	He, B. M., and Wei, M. X. (2004). A study on self-purification ability of Beihai Bay. Marine Environmental Science 23(1), 16-18 (in Chinese).
1998	4.76	He, B. M., and Wei, M. X. (2004). A study on self-purification ability of Beihai Bay. Marine Environmental Science 23(1), 16-18 (in Chinese).
1999	23.04	He, B. M., and Wei, M. X. (2012). Variation of dissolve inorganic nitrogen and its relationship with environmental factors in Beihai bay in a 10 year period. Marine Sciences 36(2), 96-102 (in Chinese).
1999	11.9	He, B. M., and Wei, M. X. (2012). Variation of dissolve inorganic nitrogen and its relationship with environmental factors in Beihai bay in a 10 year period. Marine Sciences 36(2), 96-102 (in Chinese).
1999	0.79	He, B. M., and Wei, M. X. (2012). Variation of dissolve inorganic nitrogen and its relationship with environmental factors in Beihai bay in a 10 year period. Marine Sciences 36(2), 96-102 (in Chinese).
1999	22.86	He, B. M., and Wei, M. X. (2004). A study on self-purification ability of Beihai Bay. Marine Environmental Science 23(1), 16-18 (in Chinese).
1999	6.5	He, B. M., and Wei, M. X. (2004). A study on self-purification ability of Beihai Bay. Marine Environmental Science 23(1), 16-18 (in Chinese).
1999	3.64	He, B. M., and Wei, M. X. (2004). A study on self-purification ability of Beihai Bay. Marine Environmental Science 23(1), 16-18 (in Chinese).
1999	3.5	He, B. M., and Wei, M. X. (2004). A study on self-purification ability of Beihai Bay. Marine Environmental Science 23(1), 16-18 (in Chinese).
1999	0.57	He, B. M., and Wei, M. X. (2004). A study on self-purification ability of Beihai Bay. Marine Environmental Science 23(1), 16-18 (in Chinese).
1999	1.33	He, B. M., and Wei, M. X. (2004). A study on self-purification ability of Beihai Bay. Marine Environmental Science 23(1), 16-18 (in Chinese).
1999	0.785714	Wei, M. X., Tong W. P., He, B. M., and Lai, T. H. (2000). Distribution of inorganic nitrogen and its relationship to environmental factors in Beihai Bay. Marine Environmental Science 19(2), 25-29 (in Chinese).
1999	22.8571	Wei, M. X., Tong W. P., He, B. M., and Lai, T. H. (2000). Distribution of inorganic nitrogen and its relationship to environmental factors in Beihai Bay. Marine Environmental Science 19(2), 25-29 (in Chinese).
1999	12.1429	Wei, M. X., Tong W. P., He, B. M., and Lai, T. H. (2000). Distribution of inorganic nitrogen and its relationship to environmental factors in Beihai Bay. Marine Environmental Science 19(2), 25-29 (in Chinese).
2004	6.44	He, B. M., and Wei, M. X. (2012). Variation of dissolve inorganic nitrogen and its relationship with environmental factors in Beihai bay in a 10 year period. Marine Sciences 36(2), 96-102 (in Chinese).
2009	11.5	Kaiser, D., Unger, D., Qiu, G., Zhou, H. L., and Gan, H. Y. (2013). Natural and human influences on nutrient transport through a small subtropical Chinese estuary. The Science of the total environment 450-451, 92-107.
2010	17.4	Kaiser, D., Unger, D., Qiu, G., Zhou, H. L., and Gan, H. Y. (2013). Natural and human influences on nutrient transport through a small subtropical Chinese estuary. The Science of the total environment 450-451, 92-107.
2011	0.9	Kaiser, D., Unger, D., Qiu, G., Zhou, H. L., and Gan, H. Y. (2013). Natural and human influences on nutrient transport through a small subtropical Chinese estuary. The Science of the total environment 450-451, 92-107.
2011	4.8	Kaiser, D., Unger, D., Qiu, G., Zhou, H. L., and Gan, H. Y. (2013). Natural and human influences on nutrient transport through a small subtropical Chinese estuary. The Science of the total environment 450-451, 92-107.

## Sheet: NO2
Year	NO2 (µM)	References
1995	0.54	He, B. M., and Wei, M. X. (2012). Variation of dissolve inorganic nitrogen and its relationship with environmental factors in Beihai bay in a 10 year period. Marine Sciences 36(2), 96-102 (in Chinese).
1995	0.485714	Wei, M. X., and He, B. M. (1998). A study on eutrophication and red tide formation in Lianzhou Bay. Tropic Oceanology 17(4), 65-72 (in Chinese).
1995	0.478571	Wei, M. X., and He, B. M. (1998). A study on eutrophication and red tide formation in Lianzhou Bay. Tropic Oceanology 17(4), 65-72 (in Chinese).
1995	0.171429	Wei, M. X., and He, B. M. (1998). A study on eutrophication and red tide formation in Lianzhou Bay. Tropic Oceanology 17(4), 65-72 (in Chinese).
1995	0.45	Wei, M. X., and He, B. M. (1998). A study on eutrophication and red tide formation in Lianzhou Bay. Tropic Oceanology 17(4), 65-72 (in Chinese).
1995	0.25	Wei, M. X., and He, B. M. (1998). A study on eutrophication and red tide formation in Lianzhou Bay. Tropic Oceanology 17(4), 65-72 (in Chinese).
1995	0.257143	Wei, M. X., and He, B. M. (1998). A study on eutrophication and red tide formation in Lianzhou Bay. Tropic Oceanology 17(4), 65-72 (in Chinese).
1995	0.507143	Wei, M. X., and He, B. M. (1998). A study on eutrophication and red tide formation in Lianzhou Bay. Tropic Oceanology 17(4), 65-72 (in Chinese).
1995	0.314286	Wei, M. X., and He, B. M. (1998). A study on eutrophication and red tide formation in Lianzhou Bay. Tropic Oceanology 17(4), 65-72 (in Chinese).
1995	0.257143	Wei, M. X., and He, B. M. (1998). A study on eutrophication and red tide formation in Lianzhou Bay. Tropic Oceanology 17(4), 65-72 (in Chinese).
1996	0.157857	Lai, T. H., and Wei, M. X. (2003). The relation of change of five nutrients and environmental factors in Lianzhou Bay. Journal of Guangxi Academy of Sciences 19(1), 35-39 (in Chinese).
1996	0.19	Lai, T. H., and Wei, M. X. (2003). The relation of change of five nutrients and environmental factors in Lianzhou Bay. Journal of Guangxi Academy of Sciences 19(1), 35-39 (in Chinese).
1996	0.153571	Lai, T. H., and Wei, M. X. (2003). The relation of change of five nutrients and environmental factors in Lianzhou Bay. Journal of Guangxi Academy of Sciences 19(1), 35-39 (in Chinese).
1996	0.0935714	Lai, T. H., and Wei, M. X. (2003). The relation of change of five nutrients and environmental factors in Lianzhou Bay. Journal of Guangxi Academy of Sciences 19(1), 35-39 (in Chinese).
1996	0.125714	Lai, T. H., and Wei, M. X. (2003). The relation of change of five nutrients and environmental factors in Lianzhou Bay. Journal of Guangxi Academy of Sciences 19(1), 35-39 (in Chinese).
1996	0.0935714	Lai, T. H., and Wei, M. X. (2003). The relation of change of five nutrients and environmental factors in Lianzhou Bay. Journal of Guangxi Academy of Sciences 19(1), 35-39 (in Chinese).
1996	0.14	He, B. M., and Wei, M. X. (2012). Variation of dissolve inorganic nitrogen and its relationship with environmental factors in Beihai bay in a 10 year period. Marine Sciences 36(2), 96-102 (in Chinese).
1997	0.57	He, B. M., and Wei, M. X. (2012). Variation of dissolve inorganic nitrogen and its relationship with environmental factors in Beihai bay in a 10 year period. Marine Sciences 36(2), 96-102 (in Chinese).
1997	0.635	Lai, T. H., and Wei, M. X. (2003). The relation of change of five nutrients and environmental factors in Lianzhou Bay. Journal of Guangxi Academy of Sciences 19(1), 35-39 (in Chinese).
1997	0.795	Lai, T. H., and Wei, M. X. (2003). The relation of change of five nutrients and environmental factors in Lianzhou Bay. Journal of Guangxi Academy of Sciences 19(1), 35-39 (in Chinese).
1997	0.915714	Lai, T. H., and Wei, M. X. (2003). The relation of change of five nutrients and environmental factors in Lianzhou Bay. Journal of Guangxi Academy of Sciences 19(1), 35-39 (in Chinese).
1997	0.524286	Lai, T. H., and Wei, M. X. (2003). The relation of change of five nutrients and environmental factors in Lianzhou Bay. Journal of Guangxi Academy of Sciences 19(1), 35-39 (in Chinese).
1997	0.253571	Lai, T. H., and Wei, M. X. (2003). The relation of change of five nutrients and environmental factors in Lianzhou Bay. Journal of Guangxi Academy of Sciences 19(1), 35-39 (in Chinese).
1997	0.815	Lai, T. H., and Wei, M. X. (2003). The relation of change of five nutrients and environmental factors in Lianzhou Bay. Journal of Guangxi Academy of Sciences 19(1), 35-39 (in Chinese).
1997	0.0528571	Lai, T. H., and Wei, M. X. (2003). The relation of change of five nutrients and environmental factors in Lianzhou Bay. Journal of Guangxi Academy of Sciences 19(1), 35-39 (in Chinese).
1998	1.07143	Qiu, S. F., and Lai, T. H. (2004). The distribution characteristics of contents of hydrochemistry elements in the seawater of Lianzhou Bay. Journal of Guangxi Academy of Sciences 21(1), 12-16 (in Chinese).
1998	0.285714	Qiu, S. F., and Lai, T. H. (2004). The distribution characteristics of contents of hydrochemistry elements in the seawater of Lianzhou Bay. Journal of Guangxi Academy of Sciences 21(1), 12-16 (in Chinese).
1998	0.214286	Qiu, S. F., and Lai, T. H. (2004). The distribution characteristics of contents of hydrochemistry elements in the seawater of Lianzhou Bay. Journal of Guangxi Academy of Sciences 21(1), 12-16 (in Chinese).
1998	0.0714286	Qiu, S. F., and Lai, T. H. (2004). The distribution characteristics of contents of hydrochemistry elements in the seawater of Lianzhou Bay. Journal of Guangxi Academy of Sciences 21(1), 12-16 (in Chinese).
1998	0.257143	Wei, M. X., Tong W. P., He, B. M., and Lai, T. H. (2000). Distribution of inorganic nitrogen and its relationship to environmental factors in Beihai Bay. Marine Environmental Science 19(2), 25-29 (in Chinese).
1998	0.16	He, B. M., and Wei, M. X. (2004). A study on self-purification ability of Beihai Bay. Marine Environmental Science 23(1), 16-18 (in Chinese).
1998	0.34	He, B. M., and Wei, M. X. (2004). A study on self-purification ability of Beihai Bay. Marine Environmental Science 23(1), 16-18 (in Chinese).
1999	1.06	He, B. M., and Wei, M. X. (2012). Variation of dissolve inorganic nitrogen and its relationship with environmental factors in Beihai bay in a 10 year period. Marine Sciences 36(2), 96-102 (in Chinese).
1999	0.27	He, B. M., and Wei, M. X. (2012). Variation of dissolve inorganic nitrogen and its relationship with environmental factors in Beihai bay in a 10 year period. Marine Sciences 36(2), 96-102 (in Chinese).
1999	0.046	He, B. M., and Wei, M. X. (2012). Variation of dissolve inorganic nitrogen and its relationship with environmental factors in Beihai bay in a 10 year period. Marine Sciences 36(2), 96-102 (in Chinese).
1999	1.04	He, B. M., and Wei, M. X. (2004). A study on self-purification ability of Beihai Bay. Marine Environmental Science 23(1), 16-18 (in Chinese).
1999	0.37	He, B. M., and Wei, M. X. (2004). A study on self-purification ability of Beihai Bay. Marine Environmental Science 23(1), 16-18 (in Chinese).
1999	0.23	He, B. M., and Wei, M. X. (2004). A study on self-purification ability of Beihai Bay. Marine Environmental Science 23(1), 16-18 (in Chinese).
1999	0.17	He, B. M., and Wei, M. X. (2004). A study on self-purification ability of Beihai Bay. Marine Environmental Science 23(1), 16-18 (in Chinese).
1999	0.018	He, B. M., and Wei, M. X. (2004). A study on self-purification ability of Beihai Bay. Marine Environmental Science 23(1), 16-18 (in Chinese).
1999	0.08	He, B. M., and Wei, M. X. (2004). A study on self-purification ability of Beihai Bay. Marine Environmental Science 23(1), 16-18 (in Chinese).
1999	0.0435714	Wei, M. X., Tong W. P., He, B. M., and Lai, T. H. (2000). Distribution of inorganic nitrogen and its relationship to environmental factors in Beihai Bay. Marine Environmental Science 19(2), 25-29 (in Chinese).
1999	1	Wei, M. X., Tong W. P., He, B. M., and Lai, T. H. (2000). Distribution of inorganic nitrogen and its relationship to environmental factors in Beihai Bay. Marine Environmental Science 19(2), 25-29 (in Chinese).
1999	0.257143	Wei, M. X., Tong W. P., He, B. M., and Lai, T. H. (2000). Distribution of inorganic nitrogen and its relationship to environmental factors in Beihai Bay. Marine Environmental Science 19(2), 25-29 (in Chinese).
2004	0.37	He, B. M., and Wei, M. X. (2012). Variation of dissolve inorganic nitrogen and its relationship with environmental factors in Beihai bay in a 10 year period. Marine Sciences 36(2), 96-102 (in Chinese).
2009	0.62	Kaiser, D., Unger, D., Qiu, G., Zhou, H. L., and Gan, H. Y. (2013). Natural and human influences on nutrient transport through a small subtropical Chinese estuary. The Science of the total environment 450-451, 92-107.
2010	0.64	Kaiser, D., Unger, D., Qiu, G., Zhou, H. L., and Gan, H. Y. (2013). Natural and human influences on nutrient transport through a small subtropical Chinese estuary. The Science of the total environment 450-451, 92-107.
2011	0.55	Kaiser, D., Unger, D., Qiu, G., Zhou, H. L., and Gan, H. Y. (2013). Natural and human influences on nutrient transport through a small subtropical Chinese estuary. The Science of the total environment 450-451, 92-107.
2011	0.42	Kaiser, D., Unger, D., Qiu, G., Zhou, H. L., and Gan, H. Y. (2013). Natural and human influences on nutrient transport through a small subtropical Chinese estuary. The Science of the total environment 450-451, 92-107.

## Sheet: NH4
Year	NH4 (µM)	References
1995	5.05	He, B. M., and Wei, M. X. (2012). Variation of dissolve inorganic nitrogen and its relationship with environmental factors in Beihai bay in a 10 year period. Marine Sciences 36(2), 96-102 (in Chinese).
1995	6.57143	Wei, M. X., and He, B. M. (1998). A study on eutrophication and red tide formation in Lianzhou Bay. Tropic Oceanology 17(4), 65-72 (in Chinese).
1995	5.21429	Wei, M. X., and He, B. M. (1998). A study on eutrophication and red tide formation in Lianzhou Bay. Tropic Oceanology 17(4), 65-72 (in Chinese).
1995	3	Wei, M. X., and He, B. M. (1998). A study on eutrophication and red tide formation in Lianzhou Bay. Tropic Oceanology 17(4), 65-72 (in Chinese).
1995	2.42857	Wei, M. X., and He, B. M. (1998). A study on eutrophication and red tide formation in Lianzhou Bay. Tropic Oceanology 17(4), 65-72 (in Chinese).
1995	3.21429	Wei, M. X., and He, B. M. (1998). A study on eutrophication and red tide formation in Lianzhou Bay. Tropic Oceanology 17(4), 65-72 (in Chinese).
1995	8.57143	Wei, M. X., and He, B. M. (1998). A study on eutrophication and red tide formation in Lianzhou Bay. Tropic Oceanology 17(4), 65-72 (in Chinese).
1995	5.5	Wei, M. X., and He, B. M. (1998). A study on eutrophication and red tide formation in Lianzhou Bay. Tropic Oceanology 17(4), 65-72 (in Chinese).
1995	5	Wei, M. X., and He, B. M. (1998). A study on eutrophication and red tide formation in Lianzhou Bay. Tropic Oceanology 17(4), 65-72 (in Chinese).
1995	5	Wei, M. X., and He, B. M. (1998). A study on eutrophication and red tide formation in Lianzhou Bay. Tropic Oceanology 17(4), 65-72 (in Chinese).
1996	2.54857	Lai, T. H., and Wei, M. X. (2003). The relation of change of five nutrients and environmental factors in Lianzhou Bay. Journal of Guangxi Academy of Sciences 19(1), 35-39 (in Chinese).
1996	1.61857	Lai, T. H., and Wei, M. X. (2003). The relation of change of five nutrients and environmental factors in Lianzhou Bay. Journal of Guangxi Academy of Sciences 19(1), 35-39 (in Chinese).
1996	6.98786	Lai, T. H., and Wei, M. X. (2003). The relation of change of five nutrients and environmental factors in Lianzhou Bay. Journal of Guangxi Academy of Sciences 19(1), 35-39 (in Chinese).
1996	1.44357	Lai, T. H., and Wei, M. X. (2003). The relation of change of five nutrients and environmental factors in Lianzhou Bay. Journal of Guangxi Academy of Sciences 19(1), 35-39 (in Chinese).
1996	1.65571	Lai, T. H., and Wei, M. X. (2003). The relation of change of five nutrients and environmental factors in Lianzhou Bay. Journal of Guangxi Academy of Sciences 19(1), 35-39 (in Chinese).
1996	1.17143	Lai, T. H., and Wei, M. X. (2003). The relation of change of five nutrients and environmental factors in Lianzhou Bay. Journal of Guangxi Academy of Sciences 19(1), 35-39 (in Chinese).
1996	2.57	He, B. M., and Wei, M. X. (2012). Variation of dissolve inorganic nitrogen and its relationship with environmental factors in Beihai bay in a 10 year period. Marine Sciences 36(2), 96-102 (in Chinese).
1997	1.51	He, B. M., and Wei, M. X. (2012). Variation of dissolve inorganic nitrogen and its relationship with environmental factors in Beihai bay in a 10 year period. Marine Sciences 36(2), 96-102 (in Chinese).
1997	0.880714	Lai, T. H., and Wei, M. X. (2003). The relation of change of five nutrients and environmental factors in Lianzhou Bay. Journal of Guangxi Academy of Sciences 19(1), 35-39 (in Chinese).
1997	1.12071	Lai, T. H., and Wei, M. X. (2003). The relation of change of five nutrients and environmental factors in Lianzhou Bay. Journal of Guangxi Academy of Sciences 19(1), 35-39 (in Chinese).
1997	1	Lai, T. H., and Wei, M. X. (2003). The relation of change of five nutrients and environmental factors in Lianzhou Bay. Journal of Guangxi Academy of Sciences 19(1), 35-39 (in Chinese).
1997	1.34357	Lai, T. H., and Wei, M. X. (2003). The relation of change of five nutrients and environmental factors in Lianzhou Bay. Journal of Guangxi Academy of Sciences 19(1), 35-39 (in Chinese).
1997	2.08714	Lai, T. H., and Wei, M. X. (2003). The relation of change of five nutrients and environmental factors in Lianzhou Bay. Journal of Guangxi Academy of Sciences 19(1), 35-39 (in Chinese).
1997	2.14429	Lai, T. H., and Wei, M. X. (2003). The relation of change of five nutrients and environmental factors in Lianzhou Bay. Journal of Guangxi Academy of Sciences 19(1), 35-39 (in Chinese).
1997	1.98429	Lai, T. H., and Wei, M. X. (2003). The relation of change of five nutrients and environmental factors in Lianzhou Bay. Journal of Guangxi Academy of Sciences 19(1), 35-39 (in Chinese).
1998	2.14286	Qiu, S. F., and Lai, T. H. (2004). The distribution characteristics of contents of hydrochemistry elements in the seawater of Lianzhou Bay. Journal of Guangxi Academy of Sciences 21(1), 12-16 (in Chinese).
1998	1.14286	Qiu, S. F., and Lai, T. H. (2004). The distribution characteristics of contents of hydrochemistry elements in the seawater of Lianzhou Bay. Journal of Guangxi Academy of Sciences 21(1), 12-16 (in Chinese).
1998	1.21429	Qiu, S. F., and Lai, T. H. (2004). The distribution characteristics of contents of hydrochemistry elements in the seawater of Lianzhou Bay. Journal of Guangxi Academy of Sciences 21(1), 12-16 (in Chinese).
1998	1.14286	Qiu, S. F., and Lai, T. H. (2004). The distribution characteristics of contents of hydrochemistry elements in the seawater of Lianzhou Bay. Journal of Guangxi Academy of Sciences 21(1), 12-16 (in Chinese).
1998	1.21429	Wei, M. X., Tong W. P., He, B. M., and Lai, T. H. (2000). Distribution of inorganic nitrogen and its relationship to environmental factors in Beihai Bay. Marine Environmental Science 19(2), 25-29 (in Chinese).
1998	0.58	He, B. M., and Wei, M. X. (2004). A study on self-purification ability of Beihai Bay. Marine Environmental Science 23(1), 16-18 (in Chinese).
1998	1.74	He, B. M., and Wei, M. X. (2004). A study on self-purification ability of Beihai Bay. Marine Environmental Science 23(1), 16-18 (in Chinese).
1999	2.17	He, B. M., and Wei, M. X. (2012). Variation of dissolve inorganic nitrogen and its relationship with environmental factors in Beihai bay in a 10 year period. Marine Sciences 36(2), 96-102 (in Chinese).
1999	1.15	He, B. M., and Wei, M. X. (2012). Variation of dissolve inorganic nitrogen and its relationship with environmental factors in Beihai bay in a 10 year period. Marine Sciences 36(2), 96-102 (in Chinese).
1999	0.43	He, B. M., and Wei, M. X. (2012). Variation of dissolve inorganic nitrogen and its relationship with environmental factors in Beihai bay in a 10 year period. Marine Sciences 36(2), 96-102 (in Chinese).
1999	1.86	He, B. M., and Wei, M. X. (2004). A study on self-purification ability of Beihai Bay. Marine Environmental Science 23(1), 16-18 (in Chinese).
1999	1.76	He, B. M., and Wei, M. X. (2004). A study on self-purification ability of Beihai Bay. Marine Environmental Science 23(1), 16-18 (in Chinese).
1999	0.42	He, B. M., and Wei, M. X. (2004). A study on self-purification ability of Beihai Bay. Marine Environmental Science 23(1), 16-18 (in Chinese).
1999	2.59	He, B. M., and Wei, M. X. (2004). A study on self-purification ability of Beihai Bay. Marine Environmental Science 23(1), 16-18 (in Chinese).
1999	0.31	He, B. M., and Wei, M. X. (2004). A study on self-purification ability of Beihai Bay. Marine Environmental Science 23(1), 16-18 (in Chinese).
1999	0.67	He, B. M., and Wei, M. X. (2004). A study on self-purification ability of Beihai Bay. Marine Environmental Science 23(1), 16-18 (in Chinese).
1999	0.428571	Wei, M. X., Tong W. P., He, B. M., and Lai, T. H. (2000). Distribution of inorganic nitrogen and its relationship to environmental factors in Beihai Bay. Marine Environmental Science 19(2), 25-29 (in Chinese).
1999	2.14286	Wei, M. X., Tong W. P., He, B. M., and Lai, T. H. (2000). Distribution of inorganic nitrogen and its relationship to environmental factors in Beihai Bay. Marine Environmental Science 19(2), 25-29 (in Chinese).
1999	11.4286	Wei, M. X., Tong W. P., He, B. M., and Lai, T. H. (2000). Distribution of inorganic nitrogen and its relationship to environmental factors in Beihai Bay. Marine Environmental Science 19(2), 25-29 (in Chinese).
2004	5.97	He, B. M., and Wei, M. X. (2012). Variation of dissolve inorganic nitrogen and its relationship with environmental factors in Beihai bay in a 10 year period. Marine Sciences 36(2), 96-102 (in Chinese).
2009	4.6	Kaiser, D., Unger, D., Qiu, G., Zhou, H. L., and Gan, H. Y. (2013). Natural and human influences on nutrient transport through a small subtropical Chinese estuary. The Science of the total environment 450-451, 92-107.
2010	3.4	Kaiser, D., Unger, D., Qiu, G., Zhou, H. L., and Gan, H. Y. (2013). Natural and human influences on nutrient transport through a small subtropical Chinese estuary. The Science of the total environment 450-451, 92-107.
2011	1.8	Kaiser, D., Unger, D., Qiu, G., Zhou, H. L., and Gan, H. Y. (2013). Natural and human influences on nutrient transport through a small subtropical Chinese estuary. The Science of the total environment 450-451, 92-107.
2011	2.9	Kaiser, D., Unger, D., Qiu, G., Zhou, H. L., and Gan, H. Y. (2013). Natural and human influences on nutrient transport through a small subtropical Chinese estuary. The Science of the total environment 450-451, 92-107.

## Sheet: PO4
Year	PO4 (µM)	References
1995	0.167742	Wei, M. X., and He, B. M. (1998). A study on eutrophication and red tide formation in Lianzhou Bay. Tropic Oceanology 17(4), 65-72 (in Chinese).
1995	0.212903	Wei, M. X., and He, B. M. (1998). A study on eutrophication and red tide formation in Lianzhou Bay. Tropic Oceanology 17(4), 65-72 (in Chinese).
1995	0.290323	Wei, M. X., and He, B. M. (1998). A study on eutrophication and red tide formation in Lianzhou Bay. Tropic Oceanology 17(4), 65-72 (in Chinese).
1995	0.903226	Wei, M. X., and He, B. M. (1998). A study on eutrophication and red tide formation in Lianzhou Bay. Tropic Oceanology 17(4), 65-72 (in Chinese).
1995	0.354839	Wei, M. X., and He, B. M. (1998). A study on eutrophication and red tide formation in Lianzhou Bay. Tropic Oceanology 17(4), 65-72 (in Chinese).
1995	0.419355	Wei, M. X., and He, B. M. (1998). A study on eutrophication and red tide formation in Lianzhou Bay. Tropic Oceanology 17(4), 65-72 (in Chinese).
1995	0.212903	Wei, M. X., and He, B. M. (1998). A study on eutrophication and red tide formation in Lianzhou Bay. Tropic Oceanology 17(4), 65-72 (in Chinese).
1995	2.09677	Wei, M. X., and He, B. M. (1998). A study on eutrophication and red tide formation in Lianzhou Bay. Tropic Oceanology 17(4), 65-72 (in Chinese).
1995	0.290323	Wei, M. X., and He, B. M. (1998). A study on eutrophication and red tide formation in Lianzhou Bay. Tropic Oceanology 17(4), 65-72 (in Chinese).
1996	0.225806	Lai, T. H., and Wei, M. X. (2003). The relation of change of five nutrients and environmental factors in Lianzhou Bay. Journal of Guangxi Academy of Sciences 19(1), 35-39 (in Chinese).
1996	0.112903	Lai, T. H., and Wei, M. X. (2003). The relation of change of five nutrients and environmental factors in Lianzhou Bay. Journal of Guangxi Academy of Sciences 19(1), 35-39 (in Chinese).
1996	0.177419	Lai, T. H., and Wei, M. X. (2003). The relation of change of five nutrients and environmental factors in Lianzhou Bay. Journal of Guangxi Academy of Sciences 19(1), 35-39 (in Chinese).
1996	0.209677	Lai, T. H., and Wei, M. X. (2003). The relation of change of five nutrients and environmental factors in Lianzhou Bay. Journal of Guangxi Academy of Sciences 19(1), 35-39 (in Chinese).
1996	0.0806452	Lai, T. H., and Wei, M. X. (2003). The relation of change of five nutrients and environmental factors in Lianzhou Bay. Journal of Guangxi Academy of Sciences 19(1), 35-39 (in Chinese).
1996	0.112903	Lai, T. H., and Wei, M. X. (2003). The relation of change of five nutrients and environmental factors in Lianzhou Bay. Journal of Guangxi Academy of Sciences 19(1), 35-39 (in Chinese).
1996	0.16129	Chen, Q. Y. (2001). Assessment on situation of water quality in Lianzhou Bay of Guangxi. Marine Environmental Science 20(2), 56-58 (in Chinese).
1997	0.548387	Chen, Q. Y. (2001). Assessment on situation of water quality in Lianzhou Bay of Guangxi. Marine Environmental Science 20(2), 56-58 (in Chinese).
1997	0.596452	Lai, T. H., and Wei, M. X. (2003). The relation of change of five nutrients and environmental factors in Lianzhou Bay. Journal of Guangxi Academy of Sciences 19(1), 35-39 (in Chinese).
1997	0.333871	Lai, T. H., and Wei, M. X. (2003). The relation of change of five nutrients and environmental factors in Lianzhou Bay. Journal of Guangxi Academy of Sciences 19(1), 35-39 (in Chinese).
1997	0.67129	Lai, T. H., and Wei, M. X. (2003). The relation of change of five nutrients and environmental factors in Lianzhou Bay. Journal of Guangxi Academy of Sciences 19(1), 35-39 (in Chinese).
1997	0.483871	Lai, T. H., and Wei, M. X. (2003). The relation of change of five nutrients and environmental factors in Lianzhou Bay. Journal of Guangxi Academy of Sciences 19(1), 35-39 (in Chinese).
1997	0.25871	Lai, T. H., and Wei, M. X. (2003). The relation of change of five nutrients and environmental factors in Lianzhou Bay. Journal of Guangxi Academy of Sciences 19(1), 35-39 (in Chinese).
1997	0.67129	Lai, T. H., and Wei, M. X. (2003). The relation of change of five nutrients and environmental factors in Lianzhou Bay. Journal of Guangxi Academy of Sciences 19(1), 35-39 (in Chinese).
1997	0.333871	Lai, T. H., and Wei, M. X. (2003). The relation of change of five nutrients and environmental factors in Lianzhou Bay. Journal of Guangxi Academy of Sciences 19(1), 35-39 (in Chinese).
1998	0.258065	Qiu, S. F., and Lai, T. H. (2004). The distribution characteristics of contents of hydrochemistry elements in the seawater of Lianzhou Bay. Journal of Guangxi Academy of Sciences 21(1), 12-16 (in Chinese).
1998	0.290323	Qiu, S. F., and Lai, T. H. (2004). The distribution characteristics of contents of hydrochemistry elements in the seawater of Lianzhou Bay. Journal of Guangxi Academy of Sciences 21(1), 12-16 (in Chinese).
1998	0.258065	Qiu, S. F., and Lai, T. H. (2004). The distribution characteristics of contents of hydrochemistry elements in the seawater of Lianzhou Bay. Journal of Guangxi Academy of Sciences 21(1), 12-16 (in Chinese).
1998	0.225806	Qiu, S. F., and Lai, T. H. (2004). The distribution characteristics of contents of hydrochemistry elements in the seawater of Lianzhou Bay. Journal of Guangxi Academy of Sciences 21(1), 12-16 (in Chinese).
1998	0.16129	Chen, Q. Y. (2001). Assessment on situation of water quality in Lianzhou Bay of Guangxi. Marine Environmental Science 20(2), 56-58 (in Chinese).
1998	0.254839	Wei, M. X., Tong W. P., He, B. M., and Lai, T. H. (2000). Study on the spatial distribution of inorganic phosphorus and dissolved oxygen in the Beihai Bay and their correlation. Marine Science Bulletin 19(4), 29-35 (in Chinese).
1999	0.209677	Wei, M. X., Tong W. P., He, B. M., and Lai, T. H. (2000). Study on the spatial distribution of inorganic phosphorus and dissolved oxygen in the Beihai Bay and their correlation. Marine Science Bulletin 19(4), 29-35 (in Chinese).
1999	0.209677	Wei, M. X., Tong W. P., He, B. M., and Lai, T. H. (2000). Study on the spatial distribution of inorganic phosphorus and dissolved oxygen in the Beihai Bay and their correlation. Marine Science Bulletin 19(4), 29-35 (in Chinese).
1999	0.283871	Wei, M. X., Tong W. P., He, B. M., and Lai, T. H. (2000). Study on the spatial distribution of inorganic phosphorus and dissolved oxygen in the Beihai Bay and their correlation. Marine Science Bulletin 19(4), 29-35 (in Chinese).
2009	0.354839	Li, P., Liu, B. L., and Chen, X. Y. (2011). Nutrients distribution and eutrophication in aquaculture area at Lianzhou Bay, Guangxi. Science & technology communication 17, 75-76 (in Chinese).
2009	0.451613	Li, P., Liu, B. L., and Chen, X. Y. (2011). Nutrients distribution and eutrophication in aquaculture area at Lianzhou Bay, Guangxi. Science & technology communication 17, 75-76 (in Chinese).
2009	1.58065	Li, P., Liu, B. L., and Chen, X. Y. (2011). Nutrients distribution and eutrophication in aquaculture area at Lianzhou Bay, Guangxi. Science & technology communication 17, 75-76 (in Chinese).
2010	0.774194	Li, P., Liu, B. L., and Chen, X. Y. (2011). Nutrients distribution and eutrophication in aquaculture area at Lianzhou Bay, Guangxi. Science & technology communication 17, 75-76 (in Chinese).
2010	1.35484	Li, P., Liu, B. L., and Chen, X. Y. (2011). Nutrients distribution and eutrophication in aquaculture area at Lianzhou Bay, Guangxi. Science & technology communication 17, 75-76 (in Chinese).
2010	1.80645	Li, P., Liu, B. L., and Chen, X. Y. (2011). Nutrients distribution and eutrophication in aquaculture area at Lianzhou Bay, Guangxi. Science & technology communication 17, 75-76 (in Chinese).
2010	0.325806	Lai, J. X., Jiang, F. J., Ke, K., Xu, M. B., Lei, F., and Chen, B. (2014). Nutrients distribution and trophic status assessment in the northern Beibu Gulf, China. Chinese Journal of Oceanology & Limnology 32(5), 1128-1144.
1991	0.258065	Qin, Q. R., and Long, X. H. (2000). Assessment on eutrophication of Beihai offshore. Marine Environmental Science 19(2), 43-45 (in Chinese).
1991	0.16129	Qin, Q. R., and Long, X. H. (2000). Assessment on eutrophication of Beihai offshore. Marine Environmental Science 19(2), 43-45 (in Chinese).
1992	0.258065	Qin, Q. R., and Long, X. H. (2000). Assessment on eutrophication of Beihai offshore. Marine Environmental Science 19(2), 43-45 (in Chinese).
1992	0.16129	Qin, Q. R., and Long, X. H. (2000). Assessment on eutrophication of Beihai offshore. Marine Environmental Science 19(2), 43-45 (in Chinese).
1993	0.16129	Qin, Q. R., and Long, X. H. (2000). Assessment on eutrophication of Beihai offshore. Marine Environmental Science 19(2), 43-45 (in Chinese).
1993	0.16129	Qin, Q. R., and Long, X. H. (2000). Assessment on eutrophication of Beihai offshore. Marine Environmental Science 19(2), 43-45 (in Chinese).
1994	0.225806	Qin, Q. R., and Long, X. H. (2000). Assessment on eutrophication of Beihai offshore. Marine Environmental Science 19(2), 43-45 (in Chinese).
1994	0.129032	Qin, Q. R., and Long, X. H. (2000). Assessment on eutrophication of Beihai offshore. Marine Environmental Science 19(2), 43-45 (in Chinese).
1995	0.89	He, B. M., and Wei, M. X. (2009). Reason and mechanism caused red tide in Beihai Bay. Marine Environmental Science 28(1), 62-66 (in Chinese).
1995	0.21	He, B. M., and Wei, M. X. (2009). Reason and mechanism caused red tide in Beihai Bay. Marine Environmental Science 28(1), 62-66 (in Chinese).
1996	0.15	He, B. M., and Wei, M. X. (2009). Reason and mechanism caused red tide in Beihai Bay. Marine Environmental Science 28(1), 62-66 (in Chinese).
1996	0.0645161	Qin, Q. R., and Long, X. H. (2000). Assessment on eutrophication of Beihai offshore. Marine Environmental Science 19(2), 43-45 (in Chinese).
1996	0.0645161	Qin, Q. R., and Long, X. H. (2000). Assessment on eutrophication of Beihai offshore. Marine Environmental Science 19(2), 43-45 (in Chinese).
1997	0.48	He, B. M., and Wei, M. X. (2009). Reason and mechanism caused red tide in Beihai Bay. Marine Environmental Science 28(1), 62-66 (in Chinese).
1998	0.26	He, B. M., and Wei, M. X. (2009). Reason and mechanism caused red tide in Beihai Bay. Marine Environmental Science 28(1), 62-66 (in Chinese).
1999	0.21	He, B. M., and Wei, M. X. (2009). Reason and mechanism caused red tide in Beihai Bay. Marine Environmental Science 28(1), 62-66 (in Chinese).
1999	0.21	He, B. M., and Wei, M. X. (2009). Reason and mechanism caused red tide in Beihai Bay. Marine Environmental Science 28(1), 62-66 (in Chinese).
1999	0.28	He, B. M., and Wei, M. X. (2009). Reason and mechanism caused red tide in Beihai Bay. Marine Environmental Science 28(1), 62-66 (in Chinese).
1999	0.24	Wei, M. X., Tong W. P., Lai, T. H., and He, B. M. (2001). The change characteristics of biogenic elements and their influencing factors in Tieshangang Port. Transactions of Oceanology and Limnology (4), 23-27 (in Chinese).
1999	0.258065	Chen, Q. Y. (2001). Assessment on situation of water quality in Lianzhou Bay of Guangxi. Marine Environmental Science 20(2), 56-58 (in Chinese).
2000	0.16129	Chen, Q. Y. (2001). Assessment on situation of water quality in Lianzhou Bay of Guangxi. Marine Environmental Science 20(2), 56-58 (in Chinese).
2003	0.548387	Qiu, S. F., and Lai, T. H. (2005). The changing characteristics of contents of physical and chemical factors in the sea water of Lianzhou Bay. Journal of Guangxi Academy of Sciences 21(3), 151-154 (in Chinese).
2003	0.774194	Qiu, S. F., and Lai, T. H. (2005). The changing characteristics of contents of physical and chemical factors in the sea water of Lianzhou Bay. Journal of Guangxi Academy of Sciences 21(3), 151-154 (in Chinese).
2004	0.419355	Qiu, S. F., and Lai, T. H. (2005). The changing characteristics of contents of physical and chemical factors in the sea water of Lianzhou Bay. Journal of Guangxi Academy of Sciences 21(3), 151-154 (in Chinese).
2004	1.06452	Qiu, S. F., and Lai, T. H. (2005). The changing characteristics of contents of physical and chemical factors in the sea water of Lianzhou Bay. Journal of Guangxi Academy of Sciences 21(3), 151-154 (in Chinese).
2004	0.63	He, B. M., and Wei, M. X. (2009). Reason and mechanism caused red tide in Beihai Bay. Marine Environmental Science 28(1), 62-66 (in Chinese).
2008	0.154839	Yang, Y., and Li, G. L. (2010). Analysis of the hydrochemistry environmental parameter variations in culture areas of Pinctada martensii dunker in Beihai Yingpan. Journal of Guangxi Academy of Sciences 26(2), 152-155 (in Chinese).
2008	0.154839	Yang, Y., and Li, G. L. (2010). Analysis of the hydrochemistry environmental parameter variations in culture areas of Pinctada martensii dunker in Beihai Yingpan. Journal of Guangxi Academy of Sciences 26(2), 152-155 (in Chinese).
2008	0.154839	Yang, Y., and Li, G. L. (2010). Analysis of the hydrochemistry environmental parameter variations in culture areas of Pinctada martensii dunker in Beihai Yingpan. Journal of Guangxi Academy of Sciences 26(2), 152-155 (in Chinese).
2008	0.154839	Yang, Y., and Li, G. L. (2010). Analysis of the hydrochemistry environmental parameter variations in culture areas of Pinctada martensii dunker in Beihai Yingpan. Journal of Guangxi Academy of Sciences 26(2), 152-155 (in Chinese).
2008	0.2	Yang, Y., and Li, G. L. (2010). Analysis of the hydrochemistry environmental parameter variations in culture areas of Pinctada martensii dunker in Beihai Yingpan. Journal of Guangxi Academy of Sciences 26(2), 152-155 (in Chinese).
2008	0.154839	Yang, Y., and Li, G. L. (2010). Analysis of the hydrochemistry environmental parameter variations in culture areas of Pinctada martensii dunker in Beihai Yingpan. Journal of Guangxi Academy of Sciences 26(2), 152-155 (in Chinese).
2008	0.154839	Yang, Y., and Li, G. L. (2010). Analysis of the hydrochemistry environmental parameter variations in culture areas of Pinctada martensii dunker in Beihai Yingpan. Journal of Guangxi Academy of Sciences 26(2), 152-155 (in Chinese).
2009	0.122581	Yang, Y., and Li, G. L. (2010). Analysis of the hydrochemistry environmental parameter variations in culture areas of Pinctada martensii dunker in Beihai Yingpan. Journal of Guangxi Academy of Sciences 26(2), 152-155 (in Chinese).
2009	0.122581	Yang, Y., and Li, G. L. (2010). Analysis of the hydrochemistry environmental parameter variations in culture areas of Pinctada martensii dunker in Beihai Yingpan. Journal of Guangxi Academy of Sciences 26(2), 152-155 (in Chinese).
2009	0.0387097	Yang, Y., and Li, G. L. (2010). Analysis of the hydrochemistry environmental parameter variations in culture areas of Pinctada martensii dunker in Beihai Yingpan. Journal of Guangxi Academy of Sciences 26(2), 152-155 (in Chinese).
2009	0.0774194	Yang, Y., and Li, G. L. (2010). Analysis of the hydrochemistry environmental parameter variations in culture areas of Pinctada martensii dunker in Beihai Yingpan. Journal of Guangxi Academy of Sciences 26(2), 152-155 (in Chinese).
2009	0.122581	Yang, Y., and Li, G. L. (2010). Analysis of the hydrochemistry environmental parameter variations in culture areas of Pinctada martensii dunker in Beihai Yingpan. Journal of Guangxi Academy of Sciences 26(2), 152-155 (in Chinese).
2009	0.0774194	Yang, Y., and Li, G. L. (2010). Analysis of the hydrochemistry environmental parameter variations in culture areas of Pinctada martensii dunker in Beihai Yingpan. Journal of Guangxi Academy of Sciences 26(2), 152-155 (in Chinese).
2009	0.122581	Yang, Y., and Li, G. L. (2010). Analysis of the hydrochemistry environmental parameter variations in culture areas of Pinctada martensii dunker in Beihai Yingpan. Journal of Guangxi Academy of Sciences 26(2), 152-155 (in Chinese).
2009	0.354839	Li, P., Liu, B. L., and Chen, X. Y. (2011). Nutrients distribution and eutrophication in aquaculture area at Lianzhou Bay, Guangxi. Science & technology communication 17, 75-76 (in Chinese).
2009	0.451613	Li, P., Liu, B. L., and Chen, X. Y. (2011). Nutrients distribution and eutrophication in aquaculture area at Lianzhou Bay, Guangxi. Science & technology communication 17, 75-76 (in Chinese).
2009	1.58065	Li, P., Liu, B. L., and Chen, X. Y. (2011). Nutrients distribution and eutrophication in aquaculture area at Lianzhou Bay, Guangxi. Science & technology communication 17, 75-76 (in Chinese).
2009	0.6	Kaiser, D., Unger, D., Qiu, G., Zhou, H. L., and Gan, H. Y. (2013). Natural and human influences on nutrient transport through a small subtropical Chinese estuary. The Science of the total environment 450-451, 92-107.
2010	0.7	Kaiser, D., Unger, D., Qiu, G., Zhou, H. L., and Gan, H. Y. (2013). Natural and human influences on nutrient transport through a small subtropical Chinese estuary. The Science of the total environment 450-451, 92-107.
2011	1.9	Kaiser, D., Unger, D., Qiu, G., Zhou, H. L., and Gan, H. Y. (2013). Natural and human influences on nutrient transport through a small subtropical Chinese estuary. The Science of the total environment 450-451, 92-107.
2011	0.6	Kaiser, D., Unger, D., Qiu, G., Zhou, H. L., and Gan, H. Y. (2013). Natural and human influences on nutrient transport through a small subtropical Chinese estuary. The Science of the total environment 450-451, 92-107.
2010	0.774194	Li, P., Liu, B. L., and Chen, X. Y. (2011). Nutrients distribution and eutrophication in aquaculture area at Lianzhou Bay, Guangxi. Science & technology communication 17, 75-76 (in Chinese).
2010	1.35484	Li, P., Liu, B. L., and Chen, X. Y. (2011). Nutrients distribution and eutrophication in aquaculture area at Lianzhou Bay, Guangxi. Science & technology communication 17, 75-76 (in Chinese).
2010	1.80645	Li, P., Liu, B. L., and Chen, X. Y. (2011). Nutrients distribution and eutrophication in aquaculture area at Lianzhou Bay, Guangxi. Science & technology communication 17, 75-76 (in Chinese).
2010	0.58	Sun, T. (2012). Water movement, water quality investigation and the strategies towards aquaculture waste water discharge: A case study in Lianzhou Bay, Guangxi Province, China. [Dissertation]. [Qingdao]: Ocean University of China, pp. 44-54 (in Chinese).
2014	1.64516	Yang, J., Zhang, R. D., Zhao, Z. M., Weng, S. C., and Li, F. H. (2015). Temporal and spatial distribution characteristics of nutrients in the coastal seawater of Guangxi Beibu Gulf during the past 25 years. Ecology & Environmental Sciences 24(9), 1493-1498 (in Chinese).
2014	1.32258	Yang, J., Zhang, R. D., Zhao, Z. M., Weng, S. C., and Li, F. H. (2015). Temporal and spatial distribution characteristics of nutrients in the coastal seawater of Guangxi Beibu Gulf during the past 25 years. Ecology & Environmental Sciences 24(9), 1493-1498 (in Chinese).
2009	0.296774	Zhang, S. F., Song, D. H., Zhang, C. H., and Xing, S. K. (2014). Numerical simulation on pollutant concentrations of DIN, DIP and COD in Lianzhou Bay, Guangxi. Journal of Qinzhou University 29(8), 1-5 (in Chinese).
2013	1.17419	Huang, L. Y., Li, X. Z., Wu, X. Q., Yang, S. L., Wei, X. X., and Pang, Y. F. (2017). Water quality evaluation of shellfish culture areas of Lianzhou Bay based on principal component analysis method. Fishery Modernization 44(1), 69-74 (in Chinese).
2014	1.54839	Huang, L. Y., Li, X. Z., Wu, X. Q., Yang, S. L., Wei, X. X., and Pang, Y. F. (2017). Water quality evaluation of shellfish culture areas of Lianzhou Bay based on principal component analysis method. Fishery Modernization 44(1), 69-74 (in Chinese).
2015	1.16129	Huang, L. Y., Li, X. Z., Wu, X. Q., Yang, S. L., Wei, X. X., and Pang, Y. F. (2017). Water quality evaluation of shellfish culture areas of Lianzhou Bay based on principal component analysis method. Fishery Modernization 44(1), 69-74 (in Chinese).

## Sheet: SiO3
Year	SiO3 (µM)	References
1996	15.0571	Lai, T. H., and Wei, M. X. (2003). The relation of change of five nutrients and environmental factors in Lianzhou Bay. Journal of Guangxi Academy of Sciences 19(1), 35-39 (in Chinese).
1996	24.05	Lai, T. H., and Wei, M. X. (2003). The relation of change of five nutrients and environmental factors in Lianzhou Bay. Journal of Guangxi Academy of Sciences 19(1), 35-39 (in Chinese).
1996	20.3786	Lai, T. H., and Wei, M. X. (2003). The relation of change of five nutrients and environmental factors in Lianzhou Bay. Journal of Guangxi Academy of Sciences 19(1), 35-39 (in Chinese).
1996	9.48571	Lai, T. H., and Wei, M. X. (2003). The relation of change of five nutrients and environmental factors in Lianzhou Bay. Journal of Guangxi Academy of Sciences 19(1), 35-39 (in Chinese).
1996	21.2643	Lai, T. H., and Wei, M. X. (2003). The relation of change of five nutrients and environmental factors in Lianzhou Bay. Journal of Guangxi Academy of Sciences 19(1), 35-39 (in Chinese).
1996	14.0464	Lai, T. H., and Wei, M. X. (2003). The relation of change of five nutrients and environmental factors in Lianzhou Bay. Journal of Guangxi Academy of Sciences 19(1), 35-39 (in Chinese).
1997	106.054	Lai, T. H., and Wei, M. X. (2003). The relation of change of five nutrients and environmental factors in Lianzhou Bay. Journal of Guangxi Academy of Sciences 19(1), 35-39 (in Chinese).
1997	62.4179	Lai, T. H., and Wei, M. X. (2003). The relation of change of five nutrients and environmental factors in Lianzhou Bay. Journal of Guangxi Academy of Sciences 19(1), 35-39 (in Chinese).
1997	113.032	Lai, T. H., and Wei, M. X. (2003). The relation of change of five nutrients and environmental factors in Lianzhou Bay. Journal of Guangxi Academy of Sciences 19(1), 35-39 (in Chinese).
1997	62.4179	Lai, T. H., and Wei, M. X. (2003). The relation of change of five nutrients and environmental factors in Lianzhou Bay. Journal of Guangxi Academy of Sciences 19(1), 35-39 (in Chinese).
1997	28.9	Lai, T. H., and Wei, M. X. (2003). The relation of change of five nutrients and environmental factors in Lianzhou Bay. Journal of Guangxi Academy of Sciences 19(1), 35-39 (in Chinese).
1997	87.8714	Lai, T. H., and Wei, M. X. (2003). The relation of change of five nutrients and environmental factors in Lianzhou Bay. Journal of Guangxi Academy of Sciences 19(1), 35-39 (in Chinese).
1997	26.2929	Lai, T. H., and Wei, M. X. (2003). The relation of change of five nutrients and environmental factors in Lianzhou Bay. Journal of Guangxi Academy of Sciences 19(1), 35-39 (in Chinese).
1998	17.8571	Qiu, S. F., and Lai, T. H. (2004). The distribution characteristics of contents of hydrochemistry elements in the seawater of Lianzhou Bay. Journal of Guangxi Academy of Sciences 21(1), 12-16 (in Chinese).
1998	45.3571	Qiu, S. F., and Lai, T. H. (2004). The distribution characteristics of contents of hydrochemistry elements in the seawater of Lianzhou Bay. Journal of Guangxi Academy of Sciences 21(1), 12-16 (in Chinese).
1998	25.3571	Qiu, S. F., and Lai, T. H. (2004). The distribution characteristics of contents of hydrochemistry elements in the seawater of Lianzhou Bay. Journal of Guangxi Academy of Sciences 21(1), 12-16 (in Chinese).
1998	9.64286	Qiu, S. F., and Lai, T. H. (2004). The distribution characteristics of contents of hydrochemistry elements in the seawater of Lianzhou Bay. Journal of Guangxi Academy of Sciences 21(1), 12-16 (in Chinese).
1998	25.28	Wei, M. X., Tong W. P., He, B. M., and Lai, T. H. (2001). Geochemistry characteristics of disolved Si in seawater of Beihai Bay. Marine Environmental Science 20(4), 26-29 (in Chinese).
1999	9.59	Wei, M. X., Tong W. P., Lai, T. H., and He, B. M. (2001). The change characteristics of biogenic elements and their influencing factors in Tieshangang Port. Transactions of Oceanology and Limnology (4), 23-27 (in Chinese).
1999	9.61	Wei, M. X., Tong W. P., He, B. M., and Lai, T. H. (2001). Geochemistry characteristics of disolved Si in seawater of Beihai Bay. Marine Environmental Science 20(4), 26-29 (in Chinese).
1999	17.8	Wei, M. X., Tong W. P., He, B. M., and Lai, T. H. (2001). Geochemistry characteristics of disolved Si in seawater of Beihai Bay. Marine Environmental Science 20(4), 26-29 (in Chinese).
1999	45.21	Wei, M. X., Tong W. P., He, B. M., and Lai, T. H. (2001). Geochemistry characteristics of disolved Si in seawater of Beihai Bay. Marine Environmental Science 20(4), 26-29 (in Chinese).
2003	16.6786	Qiu, S. F., and Lai, T. H. (2005). The changing characteristics of contents of physical and chemical factors in the sea water of Lianzhou Bay. Journal of Guangxi Academy of Sciences 21(3), 151-154 (in Chinese).
2003	23.8214	Qiu, S. F., and Lai, T. H. (2005). The changing characteristics of contents of physical and chemical factors in the sea water of Lianzhou Bay. Journal of Guangxi Academy of Sciences 21(3), 151-154 (in Chinese).
2004	5.10714	Qiu, S. F., and Lai, T. H. (2005). The changing characteristics of contents of physical and chemical factors in the sea water of Lianzhou Bay. Journal of Guangxi Academy of Sciences 21(3), 151-154 (in Chinese).
2004	16.1429	Qiu, S. F., and Lai, T. H. (2005). The changing characteristics of contents of physical and chemical factors in the sea water of Lianzhou Bay. Journal of Guangxi Academy of Sciences 21(3), 151-154 (in Chinese).
2008	6.42857	Yang, Y., and Li, G. L. (2010). Analysis of the hydrochemistry environmental parameter variations in culture areas of Pinctada martensii dunker in Beihai Yingpan. Journal of Guangxi Academy of Sciences 26(2), 152-155 (in Chinese).
2008	6.78571	Yang, Y., and Li, G. L. (2010). Analysis of the hydrochemistry environmental parameter variations in culture areas of Pinctada martensii dunker in Beihai Yingpan. Journal of Guangxi Academy of Sciences 26(2), 152-155 (in Chinese).
2008	6.07143	Yang, Y., and Li, G. L. (2010). Analysis of the hydrochemistry environmental parameter variations in culture areas of Pinctada martensii dunker in Beihai Yingpan. Journal of Guangxi Academy of Sciences 26(2), 152-155 (in Chinese).
2008	6.07143	Yang, Y., and Li, G. L. (2010). Analysis of the hydrochemistry environmental parameter variations in culture areas of Pinctada martensii dunker in Beihai Yingpan. Journal of Guangxi Academy of Sciences 26(2), 152-155 (in Chinese).
2008	6.78571	Yang, Y., and Li, G. L. (2010). Analysis of the hydrochemistry environmental parameter variations in culture areas of Pinctada martensii dunker in Beihai Yingpan. Journal of Guangxi Academy of Sciences 26(2), 152-155 (in Chinese).
2008	7.85714	Yang, Y., and Li, G. L. (2010). Analysis of the hydrochemistry environmental parameter variations in culture areas of Pinctada martensii dunker in Beihai Yingpan. Journal of Guangxi Academy of Sciences 26(2), 152-155 (in Chinese).
2008	8.21429	Yang, Y., and Li, G. L. (2010). Analysis of the hydrochemistry environmental parameter variations in culture areas of Pinctada martensii dunker in Beihai Yingpan. Journal of Guangxi Academy of Sciences 26(2), 152-155 (in Chinese).
2009	1.42857	Yang, Y., and Li, G. L. (2010). Analysis of the hydrochemistry environmental parameter variations in culture areas of Pinctada martensii dunker in Beihai Yingpan. Journal of Guangxi Academy of Sciences 26(2), 152-155 (in Chinese).
2009	1.17857	Yang, Y., and Li, G. L. (2010). Analysis of the hydrochemistry environmental parameter variations in culture areas of Pinctada martensii dunker in Beihai Yingpan. Journal of Guangxi Academy of Sciences 26(2), 152-155 (in Chinese).
2009	0.821429	Yang, Y., and Li, G. L. (2010). Analysis of the hydrochemistry environmental parameter variations in culture areas of Pinctada martensii dunker in Beihai Yingpan. Journal of Guangxi Academy of Sciences 26(2), 152-155 (in Chinese).
2009	1.53571	Yang, Y., and Li, G. L. (2010). Analysis of the hydrochemistry environmental parameter variations in culture areas of Pinctada martensii dunker in Beihai Yingpan. Journal of Guangxi Academy of Sciences 26(2), 152-155 (in Chinese).
2009	1.17857	Yang, Y., and Li, G. L. (2010). Analysis of the hydrochemistry environmental parameter variations in culture areas of Pinctada martensii dunker in Beihai Yingpan. Journal of Guangxi Academy of Sciences 26(2), 152-155 (in Chinese).
2009	2.25	Yang, Y., and Li, G. L. (2010). Analysis of the hydrochemistry environmental parameter variations in culture areas of Pinctada martensii dunker in Beihai Yingpan. Journal of Guangxi Academy of Sciences 26(2), 152-155 (in Chinese).
2009	1.28571	Yang, Y., and Li, G. L. (2010). Analysis of the hydrochemistry environmental parameter variations in culture areas of Pinctada martensii dunker in Beihai Yingpan. Journal of Guangxi Academy of Sciences 26(2), 152-155 (in Chinese).
2010	32.2	Kaiser, D., Unger, D., Qiu, G., Zhou, H. L., and Gan, H. Y. (2013). Natural and human influences on nutrient transport through a small subtropical Chinese estuary. The Science of the total environment 450-451, 92-107.
2011	7.3	Kaiser, D., Unger, D., Qiu, G., Zhou, H. L., and Gan, H. Y. (2013). Natural and human influences on nutrient transport through a small subtropical Chinese estuary. The Science of the total environment 450-451, 92-107.
2011	18.7	Kaiser, D., Unger, D., Qiu, G., Zhou, H. L., and Gan, H. Y. (2013). Natural and human influences on nutrient transport through a small subtropical Chinese estuary. The Science of the total environment 450-451, 92-107.

## Sheet: COD
Year	COD (mg/L)	References
1991	1.5	Qin, Q. R., and Long, X. H. (2000). Assessment on eutrophication of Beihai offshore. Marine Environmental Science 19(2), 43-45 (in Chinese).
1991	1.5	Qin, Q. R., and Long, X. H. (2000). Assessment on eutrophication of Beihai offshore. Marine Environmental Science 19(2), 43-45 (in Chinese).
1992	0.6	Qin, Q. R., and Long, X. H. (2000). Assessment on eutrophication of Beihai offshore. Marine Environmental Science 19(2), 43-45 (in Chinese).
1992	0.5	Qin, Q. R., and Long, X. H. (2000). Assessment on eutrophication of Beihai offshore. Marine Environmental Science 19(2), 43-45 (in Chinese).
1993	1.1	Qin, Q. R., and Long, X. H. (2000). Assessment on eutrophication of Beihai offshore. Marine Environmental Science 19(2), 43-45 (in Chinese).
1993	1	Qin, Q. R., and Long, X. H. (2000). Assessment on eutrophication of Beihai offshore. Marine Environmental Science 19(2), 43-45 (in Chinese).
1994	0.6	Qin, Q. R., and Long, X. H. (2000). Assessment on eutrophication of Beihai offshore. Marine Environmental Science 19(2), 43-45 (in Chinese).
1994	0.5	Qin, Q. R., and Long, X. H. (2000). Assessment on eutrophication of Beihai offshore. Marine Environmental Science 19(2), 43-45 (in Chinese).
1995	1.06	He, B. M., and Wei, M. X. (2012). Variation of dissolve inorganic nitrogen and its relationship with environmental factors in Beihai bay in a 10 year period. Marine Sciences 36(2), 96-102 (in Chinese).
1995	1	Qin, Q. R., and Long, X. H. (2000). Assessment on eutrophication of Beihai offshore. Marine Environmental Science 19(2), 43-45 (in Chinese).
1995	0.7	Qin, Q. R., and Long, X. H. (2000). Assessment on eutrophication of Beihai offshore. Marine Environmental Science 19(2), 43-45 (in Chinese).
1995	0.79	Wei, M. X., and He, B. M. (1998). A study on eutrophication and red tide formation in Lianzhou Bay. Trop. Oceanol. 17(4), 65-72 (in Chinese).
1995	0.98	Wei, M. X., and He, B. M. (1998). A study on eutrophication and red tide formation in Lianzhou Bay. Trop. Oceanol. 17(4), 65-72 (in Chinese).
1995	0.66	Wei, M. X., and He, B. M. (1998). A study on eutrophication and red tide formation in Lianzhou Bay. Trop. Oceanol. 17(4), 65-72 (in Chinese).
1995	0.98	Wei, M. X., and He, B. M. (1998). A study on eutrophication and red tide formation in Lianzhou Bay. Trop. Oceanol. 17(4), 65-72 (in Chinese).
1995	0.76	Wei, M. X., and He, B. M. (1998). A study on eutrophication and red tide formation in Lianzhou Bay. Trop. Oceanol. 17(4), 65-72 (in Chinese).
1995	0.94	Wei, M. X., and He, B. M. (1998). A study on eutrophication and red tide formation in Lianzhou Bay. Trop. Oceanol. 17(4), 65-72 (in Chinese).
1995	1.1	Wei, M. X., and He, B. M. (1998). A study on eutrophication and red tide formation in Lianzhou Bay. Trop. Oceanol. 17(4), 65-72 (in Chinese).
1995	0.93	Wei, M. X., and He, B. M. (1998). A study on eutrophication and red tide formation in Lianzhou Bay. Trop. Oceanol. 17(4), 65-72 (in Chinese).
1995	1.15	Wei, M. X., and He, B. M. (1998). A study on eutrophication and red tide formation in Lianzhou Bay. Trop. Oceanol. 17(4), 65-72 (in Chinese).
1996	2.16	Qiu, S. F. (2001). Investigation of marine environmental quality in the offshore of four bays of Guangxi. Guangxi Sciences 8(3), 236-240 (in Chinese).
1996	1.63	Chen, Q. Y. (2001). Assessment on situation of water quality in Lianzhou Bay of Guangxi. Marine Environmental Science 20(2), 56-58 (in Chinese).
1996	0.9	Qin, Q. R., and Long, X. H. (2000). Assessment on eutrophication of Beihai offshore. Marine Environmental Science 19(2), 43-45 (in Chinese).
1996	0.5	Qin, Q. R., and Long, X. H. (2000). Assessment on eutrophication of Beihai offshore. Marine Environmental Science 19(2), 43-45 (in Chinese).
1996	2.02	He, B. M., and Wei, M. X. (2012). Variation of dissolve inorganic nitrogen and its relationship with environmental factors in Beihai bay in a 10 year period. Marine Sciences 36(2), 96-102 (in Chinese).
1997	2.38	He, B. M., and Wei, M. X. (2012). Variation of dissolve inorganic nitrogen and its relationship with environmental factors in Beihai bay in a 10 year period. Marine Sciences 36(2), 96-102 (in Chinese).
1997	1.34	Chen, Q. Y. (2001). Assessment on situation of water quality in Lianzhou Bay of Guangxi. Marine Environmental Science 20(2), 56-58 (in Chinese).
1998	1.74	Chen, Q. Y. (2001). Assessment on situation of water quality in Lianzhou Bay of Guangxi. Marine Environmental Science 20(2), 56-58 (in Chinese).
1998	2.14	Qiu, S. F., and Lai, T. H. (2004). The distribution characteristics of contents of hydrochemistry elements in the seawater of Lianzhou Bay. Journal of Guangxi Academy of Sciences 21(1), 12-16 (in Chinese).
1998	3.02	Qiu, S. F., and Lai, T. H. (2004). The distribution characteristics of contents of hydrochemistry elements in the seawater of Lianzhou Bay. Journal of Guangxi Academy of Sciences 21(1), 12-16 (in Chinese).
1998	2.02	Qiu, S. F., and Lai, T. H. (2004). The distribution characteristics of contents of hydrochemistry elements in the seawater of Lianzhou Bay. Journal of Guangxi Academy of Sciences 21(1), 12-16 (in Chinese).
1998	1.31	Qiu, S. F., and Lai, T. H. (2004). The distribution characteristics of contents of hydrochemistry elements in the seawater of Lianzhou Bay. Journal of Guangxi Academy of Sciences 21(1), 12-16 (in Chinese).
1998	1.21	He, B. M., and Wei, M. X. (2004). A study on self-purification ability of Beihai Bay. Marine Environmental Science 23(1), 16-18 (in Chinese).
1998	1.28	He, B. M., and Wei, M. X. (2004). A study on self-purification ability of Beihai Bay. Marine Environmental Science 23(1), 16-18 (in Chinese).
1998	2.02	He, B. M., and Wei, M. X. (2012). Variation of dissolve inorganic nitrogen and its relationship with environmental factors in Beihai bay in a 10 year period. Marine Sciences 36(2), 96-102 (in Chinese).
1999	2.14	He, B. M., and Wei, M. X. (2012). Variation of dissolve inorganic nitrogen and its relationship with environmental factors in Beihai bay in a 10 year period. Marine Sciences 36(2), 96-102 (in Chinese).
1999	3.02	He, B. M., and Wei, M. X. (2012). Variation of dissolve inorganic nitrogen and its relationship with environmental factors in Beihai bay in a 10 year period. Marine Sciences 36(2), 96-102 (in Chinese).
1999	1.31	He, B. M., and Wei, M. X. (2012). Variation of dissolve inorganic nitrogen and its relationship with environmental factors in Beihai bay in a 10 year period. Marine Sciences 36(2), 96-102 (in Chinese).
1999	2.07	He, B. M., and Wei, M. X. (2004). A study on self-purification ability of Beihai Bay. Marine Environmental Science 23(1), 16-18 (in Chinese).
1999	1.76	He, B. M., and Wei, M. X. (2004). A study on self-purification ability of Beihai Bay. Marine Environmental Science 23(1), 16-18 (in Chinese).
1999	2.53	He, B. M., and Wei, M. X. (2004). A study on self-purification ability of Beihai Bay. Marine Environmental Science 23(1), 16-18 (in Chinese).
1999	2.54	He, B. M., and Wei, M. X. (2004). A study on self-purification ability of Beihai Bay. Marine Environmental Science 23(1), 16-18 (in Chinese).
1999	1.9	He, B. M., and Wei, M. X. (2004). A study on self-purification ability of Beihai Bay. Marine Environmental Science 23(1), 16-18 (in Chinese).
1999	2.46	He, B. M., and Wei, M. X. (2004). A study on self-purification ability of Beihai Bay. Marine Environmental Science 23(1), 16-18 (in Chinese).
1999	1.51	Chen, Q. Y. (2001). Assessment on situation of water quality in Lianzhou Bay of Guangxi. Marine Environmental Science 20(2), 56-58 (in Chinese).
2000	1.4	Chen, Q. Y. (2001). Assessment on situation of water quality in Lianzhou Bay of Guangxi. Marine Environmental Science 20(2), 56-58 (in Chinese).
2003	1.64	Qiu, S. F., and Lai, T. H. (2005). The changing characteristics of contents of physical and chemical factors in the sea water of Lianzhou Bay. Journal of Guangxi Academy of Sciences 21(3), 151-154 (in Chinese).
2003	1.17	Qiu, S. F., and Lai, T. H. (2005). The changing characteristics of contents of physical and chemical factors in the sea water of Lianzhou Bay. Journal of Guangxi Academy of Sciences 21(3), 151-154 (in Chinese).
2004	1.23	Qiu, S. F., and Lai, T. H. (2005). The changing characteristics of contents of physical and chemical factors in the sea water of Lianzhou Bay. Journal of Guangxi Academy of Sciences 21(3), 151-154 (in Chinese).
2004	1.33	Qiu, S. F., and Lai, T. H. (2005). The changing characteristics of contents of physical and chemical factors in the sea water of Lianzhou Bay. Journal of Guangxi Academy of Sciences 21(3), 151-154 (in Chinese).
2004	1.46	He, B. M., and Wei, M. X. (2012). Variation of dissolve inorganic nitrogen and its relationship with environmental factors in Beihai bay in a 10 year period. Marine Sciences 36(2), 96-102 (in Chinese).
2009	1.65	Li, P., Liu, B. L., and Chen, X. Y. (2011). Nutrients distribution and eutrophication in aquaculture area at Lianzhou Bay, Guangxi. Science & technology communication 17, 75-76 (in Chinese).
2009	1.78	Li, P., Liu, B. L., and Chen, X. Y. (2011). Nutrients distribution and eutrophication in aquaculture area at Lianzhou Bay, Guangxi. Science & technology communication 17, 75-76 (in Chinese).
2009	1.34	Li, P., Liu, B. L., and Chen, X. Y. (2011). Nutrients distribution and eutrophication in aquaculture area at Lianzhou Bay, Guangxi. Science & technology communication 17, 75-76 (in Chinese).
2009	1.16	Zhang, S. F., Song, D. H., Zhang, C. H., and Xing, S. K. (2014). Numerical simulation on pollutant concentrations of DIN, DIP and COD in Lianzhou Bay, Guangxi. Journal of Qinzhou University 29(8), 1-5 (in Chinese).
2010	1.18	Li, P., Liu, B. L., and Chen, X. Y. (2011). Nutrients distribution and eutrophication in aquaculture area at Lianzhou Bay, Guangxi. Science & technology communication 17, 75-76 (in Chinese).
2010	0.83	Li, P., Liu, B. L., and Chen, X. Y. (2011). Nutrients distribution and eutrophication in aquaculture area at Lianzhou Bay, Guangxi. Science & technology communication 17, 75-76 (in Chinese).
2010	1.2	Li, P., Liu, B. L., and Chen, X. Y. (2011). Nutrients distribution and eutrophication in aquaculture area at Lianzhou Bay, Guangxi. Science & technology communication 17, 75-76 (in Chinese).
2010	1.05	Zhuang, J. L., Wang, Y. B., Lai, J. X., Ke, K., Dong D. X. and Chen, X. Y. (2014). Distribution characteristics and the influencing factors of COD in the coastal waters of Beihai. Journal of Guangxi Academy of Sciences 30(3), 165-169 (in Chinese).
2010	1.01	Zhuang, J. L., Wang, Y. B., Lai, J. X., Ke, K., Dong D. X. and Chen, X. Y. (2014). Distribution characteristics and the influencing factors of COD in the coastal waters of Beihai. Journal of Guangxi Academy of Sciences 30(3), 165-169 (in Chinese).
2010	0.99	Zhuang, J. L., Wang, Y. B., Lai, J. X., Ke, K., Dong D. X. and Chen, X. Y. (2014). Distribution characteristics and the influencing factors of COD in the coastal waters of Beihai. Journal of Guangxi Academy of Sciences 30(3), 165-169 (in Chinese).
2011	1.1	Zhuang, J. L., Wang, Y. B., Lai, J. X., Ke, K., Dong D. X. and Chen, X. Y. (2014). Distribution characteristics and the influencing factors of COD in the coastal waters of Beihai. Journal of Guangxi Academy of Sciences 30(3), 165-169 (in Chinese).
2013	3.17	Huang, L. Y., Li, X. Z., Wu, X. Q., Yang, S. L., Wei, X. X., and Pang, Y. F. (2017). Water quality evaluation of shellfish culture areas of Lianzhou Bay based on principal component analysis method. Fishery Modernization 44(1), 69-74 (in Chinese).
2014	1.93	Huang, L. Y., Li, X. Z., Wu, X. Q., Yang, S. L., Wei, X. X., and Pang, Y. F. (2017). Water quality evaluation of shellfish culture areas of Lianzhou Bay based on principal component analysis method. Fishery Modernization 44(1), 69-74 (in Chinese).
2015	1.57	Huang, L. Y., Li, X. Z., Wu, X. Q., Yang, S. L., Wei, X. X., and Pang, Y. F. (2017). Water quality evaluation of shellfish culture areas of Lianzhou Bay based on principal component analysis method. Fishery Modernization 44(1), 69-74 (in Chinese).
